# Supplementary material
Source: PubMed Central journal article supplement (PMC11115541)
Supplement: 18_2009_185_MOESM1_ESM.pdf [file 18_2009_185_MOESM1_ESM.pdf]

Supplementary material 1

|              | [           | Exon2      | ]          | [             | Exon 3    | ]       | [          | Exon4      |    |
|--------------|-------------|------------|------------|---------------|-----------|---------|------------|------------|----|
| Human        | MRVFCVGLLL  | -FSVTWAAP- | --TFQPQTEK | TKQSCVVEEQR   | ---       | ITYKGGH | EKHGHYVFKC | IYMSPGKKNQ | 70 |
| Chimpanzee   | .....       | -V.....    | -----      | -----         | -----     | -----   | -----      | -----      |    |
| Gorilla      | ....M....   | -.....     | -----      | -----         | -----     | -----   | -----      | V.....     |    |
| Orangutan    | .....       | -.....     | -----      | -----         | -----     | -----   | -----      | V.....     |    |
| Gibbon       | .....       | -.....     | -----      | -----         | -----     | -----   | -----      | V.....     |    |
| Macaque      | .....F      | -L.....    | -----      | -----         | -----     | -----   | -----      | V.....     |    |
| Baboon       | .....F      | -L.....    | -----      | -----         | -----     | -----   | -----      | V.....     |    |
| Marmoset     | ....W....   | -.....     | ---R....   | E.....        | -----     | -----   | ....F...Y  | V.....     |    |
| Tarsier      | .Q.A.....   | -.....     | ---A...A   | ..HG...R      | -----     | -----   | K..EY.I..Y | A.T.....   |    |
| Bushbaby     | .QGV.....   | -..A...A-  | -----      | ..G.....P     | -----     | -----   | -----      | -----      |    |
| Mouse lemur  | .Q.V....F   | -T.A....   | -----      | ..G.....      | -----     | -----   | ....Y.T..Y | V.T.....E  |    |
| Tree shrew   | .Q.V....F   | -.....     | ---S...ND  | .Q.G.....     | -----     | -----   | ....Y.M..Y | V.T.H....  |    |
| Pika         | .Q.VYI...   | -LG.....A  | GT.L...PGE | .QPG...K      | ---       | MQ....  | K....I...V | TQS...Q    |    |
| Rabbit       | .P.IYI...   | -LG.S....  | ---R...KE  | .QRG....      | ---       | M....   | ....I...V  | TL.....    |    |
| Squirrel     | .QGVY....   | -.....S-   | ---PL..V   | PR.G...H      | ---       | R....   | ..Y.Y.I..D | VNT.S..E.. |    |
| Guinea pig   | .QAV..R...  | L.....T-T- | -----      | -----         | -----     | -----   | -----      | -----      |    |
| Kangaroo rat | ..LV.I...   | -Y.....    | ---V....   | AS.GS...PK    | -----     | -----   | -----      | -----      |    |
| Rat          | .QAVS...F   | -..M.....  | -----      | -----         | -----     | -----   | -----      | -----      |    |
| Mouse        | .QAVS.....  | -..M.....  | -----      | ..V....G..... | INR-----  | -----   | -----      | -----      |    |
| Hedgehog     | .Q.V.L....  | -TLA....   | ---IK...   | .Q.D..G..K    | =====     | =====   | =====      | =====      |    |
| Shrew        | .QAV.L....  | -GL...T-   | ---G....G  | M..D.L...     | =====     | =====   | =====      | =====      |    |
| Megabat      | .QII.L....  | -..L...L-  | -----      | ..DY..K..     | ---       | S....   | ..S.I..Y   | V.T.S.R... |    |
| Microbat     | .QIV.L....  | -SHL.....  | ---V...A.. | .R.D.....     | ---V..... | -----   | ....Y.I..Y | V.T...R... |    |
| Cat          | .QIV.L....  | -.....     | ---ED..... | ..ED.....     | -----     | -----   | ....Y.M..Y | V.T.S.R..H |    |
| Dog          | .QTV.L....  | -.....     | ---G....G  | ..DD.....     | -----     | -----   | ....Y.I..Y | V.T.S.R... |    |
| Horse        | .QIV.W....  | -L.....    | ---AL..... | E.D.....      | -----     | -----   | ....Y.I..Y | V.T.S.R... |    |
| Vicugna      | ..IV.L....  | -..L.R.... | ---G....G  | ..D.....      | -----     | -----   | ....Y.M..Y | V.T...R... |    |
| Cow          | ..I..LE...  | -..L.L.... | ---L...A.. | K..DY....     | ---       | R....   | ....Y.M..Y | VST.S.R... |    |
| Dolphin      | ..II.L....  | -..L.L.... | ---L...A.. | M..DS....     | -----     | -----   | ....Y.L..F | V.T.S.R... |    |
| Pig          | ..IV.L..F.  | -..L....   | =====      | =====         | =====     | =====   | ....Y.I..Y | V.T.S.R... |    |
| Armadillo    | .Q.V.L....  | -..LA....  | -----      | ..G.....      | ---       | S....   | ..S.IY--   | V.TA..R... |    |
| Sloth        | .Q.V.L....  | -TLA....   | -----      | ..D.....      | -----     | -----   | ..S.IY.Y   | V.T.S.R... |    |
| Tenrec       | .QMI.L.M..  | -..LAR.... | ---S....S  | ..G...EK      | ---       | -----   | ....Y..L.. | V.R..RR.T. |    |
| Elephant     | .PIV.L...V  | -GL.....   | -----      | ..G...EK      | -----     | -----   | ....Y.I..  | V.T...RE.. |    |
| Hyrax        | .QIV.L...V  | -..L.....  | -----      | ..D...K       | -----     | -----   | ..R.Y.I.TH | V.S...R... |    |
| Wallaby      | .Q.I.LLS.CF | -L.LVGS... | -----      | -----         | -----     | -----   | -----      | -----      |    |
| Opossum      | .Q.I.LLS.CF | -L.LVRS... | -----      | -----         | -----     | -----   | -----      | -----      |    |
|              | #           |            |            | *             |           | ##      | #          | #          |    |

|              | ]                | ]                | ]           | ]           | ]            | ]            | ]           | ]       | ]   | ] |
|--------------|------------------|------------------|-------------|-------------|--------------|--------------|-------------|---------|-----|---|
| Human        | TDV-KQEE-K       | NKDNIG-FHH       | LKGRINQELS  | SKENIVQERK  | KDLSLSEASE   | NKG-SSKSON   | YFTNRQRNLN  | K       | 140 |   |
| Chimpanzee   | .....            | .....            | .....       | .....       | .....        | .....        | .....       | .....   |     |   |
| Gorilla      | .....            | .....            | .....       | .....       | .....        | .....        | .....       | .....   |     |   |
| Orangutan    | .....            | ..T....          | .....       | P.....      | .....        | .....        | .....       | .....   |     |   |
| Gibbon       | .....            | .....            | .....       | .....       | .....        | .....        | .....       | .....   |     |   |
| Macaque      | .....            | .....-L..        | ....RY...   | .....       | .....        | ..G..N-      | .....       | .....   |     |   |
| Baboon       | .....            | .....=..         | =...R....   | .....       | .....        | ..N-         | .....       | .....   |     |   |
| Marmoset     | .....            | .....            | ---R....    | .....K.E    | .....R.      | ..NQ-        | .....       | H.....E |     |   |
| Tarsier      | .....            | ....A-L..        | FD..R..GPL  | PR...W..Q   | .....N.      | ..NQ-...F..  | L.A...T..E  |         |     |   |
| Bushbaby     | -----            | ..RH..T-L..      | SDTGR..PL   | P...TA...   | ..NV...SN.   | ..NQ-...PSS  | LLAH..T..KE |         |     |   |
| Mouse lemur  | .GIT.....        | ....I-LR.        | .DE.RH..P   | P...V...E   | ..NV.....    | ..NQR.GE.P   | LLA.G.T..SE |         |     |   |
| Tree shrew   | ..A-...-Q        | ..S..V-SQP       | SNMKR...P   | P...TAL..P  | ..T.....     | KNH-G...L    | AS..T..E    |         |     |   |
| Pika         | SII-E...-E       | D.E.TA-LD        | SA.KS..QT.  | ..KDT...-   | ..A.L.INR    | KNQ-G.A.K    | L.A...T..E  |         |     |   |
| Rabbit       | ..N-...-E..K     | D.E.AA-LD        | FD..R..Q.   | P..DTA.G.-  | ..A.L.TIG    | KNR-V...T    | PS...T..E   |         |     |   |
| Squirrel     | ..NR-...-S...    | S...A-L..        | FE..R...P   | ..N.I.I...E | ..VFFF..NG   | ..NQ-...T    | LSA...-E    |         |     |   |
| Guinea pig   | -----            | SE.D.A-PA        | FD..RK...   | ..R...A.GE  | ..M..F...G   | ..NR-...LH   | LSPD..T..KE |         |     |   |
| Kangaroo rat | -----            | ..NN..A-DL       | EE.R...VT   | P...T.KKR   | S..PFFAVN.   | ..NK-...YS   | LLVKT.TIID  |         |     |   |
| Rat          | -----            | -----            | -----       | -----       | -----        | -----        | -----       | -----   |     |   |
| Mouse        | =====            | =====            | =====       | =====       | =====        | =====        | -----       | -----   |     |   |
| Hedgehog     | =====            | =====            | =====       | =====       | =====        | =====        | -----       | -----   |     |   |
| Shrew        | ====E.N-I        | -..K.AAL..       | F...KT...T  | PMDVS..=E   | R...DFR.T.   | ..NQ-E....   | LSES.L.M.E  |         |     |   |
| Megabat      | ..NI-..G-..      | ..N.K.A-L.Q      | S...R...SA  | ....A..KE   | ....LG.NK    | ..NQ-T....   | I.E...TM.E  |         |     |   |
| Microbat     | ..I-..E-..R      | ....A-L.L        | S...R...PA  | F.D..A..E   | ....LGVDK    | ..NQ-I....   | L.E...TT.E  |         |     |   |
| Cat          | ..I-...-K..S     | ..S.A-H.N        | S...R...PA  | P...A...E   | ..S..IVG.N.  | ..NQ-...T.T  | P.E...AT.E  |         |     |   |
| Dog          | ..I-...-I-...-I  | ....TA-LQN       | S...R...PA  | P...A...E   | ..N..ILG...  | ..E-...T.T   | L.E.I.TT.E  |         |     |   |
| Horse        | ..I-..K-..-      | ....A-V.V        | S..GR...PA  | P...A...E   | ....LG.N.    | ..NQ-...T.T  | L.E.D..TVKE |         |     |   |
| Vicugna      | ..M-...-G-..     | ....NA-L..       | S...R...PA  | PR..T...NE  | ..A..FG.N.   | ..INK-..T.PP | L.E..PTT.D  |         |     |   |
| Cow          | ..M-...-M-...-M  | ....G-A-LP       | S...S...PA  | P...L.KKE   | E..F.PRTN.   | ..NK-..T...S | LSG.K.SM.E  |         |     |   |
| Dolphin      | ..-...-I-...-I   | ....A-LP.        | S.Q.RH..PV  | PQ...KE     | ..V..PGTN.   | ..NK-..T...L | LLED..TM..  |         |     |   |
| Pig          | ..GM-...-M-...-M | ....G.D.A-LP     | S...-...-A  | T...TG..KG  | ..N...PGN.   | ..NK-..T.A.  | LIG..KTM.E  |         |     |   |
| Armadillo    | ..M-...-R-...-R  | ....A-L..        | ..K.RK..PP  | P...-...-E  | ..EN.F.H..NG | ..-K-...Q..  | L.A...KT..E |         |     |   |
| Sloth        | ..-...-R-...-R   | ....A-L..        | ..K.RK..AF  | P...-...-D  | ..NF..Y..N.  | ..NQ-..GE... | L.A.S.T..G  |         |     |   |
| Tenrec       | ..I-...-W-...-W  | ..S..RTA-L..     | ..T.RK..SP  | LEK.SA...E  | ..YV..L.TNG  | ..HQ-Q...T   | L.A..KTGHE  |         |     |   |
| Elephant     | ..I-..L-..-R     | ....DTA-L..      | P...R.K..PP | P.K...E     | ....L..N.    | ..NQ-..R...L | A...TRHE    |         |     |   |
| Hyrax        | ..I-..P-..-R     | ..H.TA-LQ.       | P..R.RKE... | P...L...E   | ..V.ASL..NG  | ..NQ-N...K   | LPA.Q.TRHE  |         |     |   |
| Wallaby      | -----            | K..R...HVP-V..   | FA..SK..I.  | ..G.VI..SD  | ..SQDI.AGKQ  | ..MLI-KDQDTG | GS--KTSHH-  |         |     |   |
| Opossum      | -----            | HK..G...GSVP-VY. | FN.ENK..I.  | P.G.AI..SE  | ..SQDI.AGKK  | ..ILN-KDEGTQ | TS--KTSHH-  |         |     |   |
|              | #                |                  | *           |             |              | *            | *           |         |     |   |

Exon 5 (continued)

|              |            |            |             |             |             |              |             |     |
|--------------|------------|------------|-------------|-------------|-------------|--------------|-------------|-----|
| Human        | EYSIS-NKEN | THNGLRMSIY | PKSTGNKGF   | DGDDAISK-L  | HDQEEYGAAL  | IRNNMQHIMG   | PVTA--IKLL  | 210 |
| Chimpanzee   | .....      | .....      | .....       | .....       | .....       | .....R       | .....       |     |
| Gorilla      | .....      | .....      | .....R..... | .....       | .....S..... | .....R       | .....       |     |
| Orangutan    | .....      | .....      | T.....      | .....       | .....T..... | .....        | .....       |     |
| Gibbon       | .....      | .....      | .....       | .....G..... | .....       | .....        | .....       |     |
| Macaque      | .....      | I.....     | .....Q.A    | .....E-     | .....       | .....        | .....       |     |
| Baboon       | .....      | I.....     | .....Q.A    | N.....      | .....       | .....        | .....       |     |
| Marmoset     | D..L.....  | IY...K.V.  | SE.....     | .V.D.....   | .....       | .....VI.     | ..V--..V    |     |
| Tarsier      | DH...Q..D  | VN.D.KI..D | S..IM..WT.  | N.....T..   | .....       | V.....L..    | ..V--==     |     |
| Bushbaby     | D...T..... | V..D.K..M. | LE.P..NEAD  | N...VI..-   | .....S...   | ..K.T.PVK    | ..AV--M...  |     |
| Mouse lemur  | D..TG....  | V.DD.K..H  | .E.P...T.   | ..ET...-    | .....SS..   | ..K.L..K..   | ..SV--...   |     |
| Tree shrew   | G...-K...  | ..DVQ....  | SNA..DQEA.  | G...A.R-    | .....       | T..Q...RT.   | ..V--T..V   |     |
| Pika         | ..NNI-IATD | ADKNPA..M. | .EP..DR.LK  | .E..A.-     | .....STG.   | N.K.LH.S.R   | ..VV--TFP.  |     |
| Rabbit       | DL.VI--TTS | V..DRE.... | .EP..DR.VD  | ....TG.-F   | .....STG.   | .GK.T..T..   | ..MMV--TGA. |     |
| Squirrel     | G.G.H-.TGK | AG.D.M..VF | .EP...A.    | ...D..N-    | .....V..    | ..S..P.GVR   | .A.VTVTE.W  |     |
| Guinea pig   | ADRVI-H.DQ | AGEHPMVP.T | .E...PS.TK  | ..SGMRS-    | .V...-T..   | L..KAPAVTR   | ..VS-EWWE   |     |
| Kangaroo rat | NTG...H.GK | A.DD.M.TWV | .E..VD.RTD  | .....H-     | PV.....TT.  | KT.S-----R   | ..NV--ME.W  |     |
| Rat          | DG.SGG.QG. | I.--.A.VK  | .EP.VG..T.  | G.R..PLH-   | P..NRQ..T.  | L..IT.PVK    | L..G--TEVQ  |     |
| Mouse        | DR.SCG.QDS | I.KD.AA.V. | .DP.VDE.T.  | ..QG.LLH-P  | PG.DR....   | L..IT.PVK    | L..G--AE.R  |     |
| Hedgehog     | =====      | =====      | =====       | =====       | =====       | =====        | =====       |     |
| Shrew        | DCL...-EV. | G.SD.T..RN | .E.SA-----  | -----VR.-A  | ..LK.SA..   | VQ..S.WTI.   | A..IL--R.SW |     |
| Megabat      | DF.T.....  | A..N.KV... | .G...N.A.   | ...TV....   | .....S...   | T.....E      | .GAV--TE..  |     |
| Microbat     | D...-H.D.  | ..D.QTP..  | .E...Y.S.   | .....VL.G-  | .....       | T...T.L.A    | .GAV--EP.   |     |
| Cat          | DDT.N....  | A.SDQKRY.. | .E...N.VD   | ..N...-     | R...H.T..   | .....E       | .G.V--TE..  |     |
| Dog          | VD..N....  | A.SD.K..V. | LE.P..N.A.  | .K.N..N.-S  | .....T..    | .....E       | .G.V--TE..  |     |
| Horse        | D.R...-K.. | AR.D.K..T. | .E...N.AK   | .....V..-   | .....S.H.   | L.KI...RE    | .G.V--VE..  |     |
| Vicugna      | .....-K..  | A.GD.K.PT. | .ELI..HRA.  | A.ES.V...-  | .V...P..    | ..S...TVE    | .GAV--TE..  |     |
| Cow          | D.I...-S.. | A.SD.K.... | .E.K.KHRA.  | .R.S..R..-  | .S..G....   | ..S.Y.G.E    | .R.V--TE..  |     |
| Dolphin      | D.R...-S.. | A.D.KT...  | .E...SR.T.  | ..N.L...-   | .....K..    | .....H..E    | .GAV--TE..  |     |
| Pig          | DQ..G....  | AP.D.K.A.. | ..SE.HKA.   | .RNS.L...-  | Q.....      | ..H...A.E    | .GAV--E..   |     |
| Armadillo    | NHNK...-K  | A.D.NK...  | .E.P..NEA.  | N.N..L...-  | .G...S...   | V...R.V..    | ..V--...    |     |
| Sloth        | DHNN...-S  | AQSD.NK.M. | .AFP...RA.  | N.SR...E-   | .....T..    | V...RN...    | ..V--GH.    |     |
| Tenrec       | H..VN-HT.D | V.ADCAV.LR | AA..RKS.P.  | KVAA.LRE-R  | DRET...-H   | PGKD.PWFP.   | .GA--LE.P   |     |
| Elephant     | DQ...-S... | AYDD.K.P.. | .E..R.NAQ   | N.....-Q    | .E...S...   | V.....L..    | ..V--TA..   |     |
| Hyrax        | DH.A...-S  | PNSN.NT..  | LE.A.N.A.   | N.N...-Q    | Q..K.H...R  | LGSSRR.RR    | ..V--NS..   |     |
| Wallaby      | DFK-----   | -----DT..  | A-GFTGNAKA  | EHAESV..D.  | ..AHSVI..   | ..NK.I...RR  | YTS--PRFW   |     |
| Opossum      | DFE-----   | -----VT..  | M-GSNGNANT  | GYGRSV..EP  | PN..VR.II.  | ..NK.V...DRK | Y.S.--KR.W  |     |

\*

Exon 5 (continued)

|              |              |            |            |             |             |            |            |     |
|--------------|--------------|------------|------------|-------------|-------------|------------|------------|-----|
| Human        | ----GEENK    | --ENTPRNVL | NIIPASMNVA | KAHSDKDK--  | ---KPQRDSQ  | AQKSPVKS   | T---HRIQHN | 280 |
| Chimpanzee   | -----        | -----      | .....      | .....       | ---         | .....      | -----      |     |
| Gorilla      | -----        | -----      | .....S..   | .....       | ---A.....   | .....      | -----      |     |
| Orangutan    | -----E...    | -----      | .K.....    | .....       | -----       | .....      | -----      |     |
| Gibbon       | -----        | -----      | .K.....    | .....       | ---P.....   | .....E.    | -----      |     |
| Macaque      | -----        | --QSK.K..  | .K.....    | .....       | -----       | V..V.....  | ..T.....   |     |
| Baboon       | -----        | --Q.K.K..  | .K.....    | .....       | -----       | V..V.I.... | ---T.....  |     |
| Marmoset     | -----        | ..K.....   | .K..R....  | ..F.....    | -----       | ..G.....   | ---Q.....  |     |
| Tarsier      | =====        | =====      | =====      | =====       | =====       | =====      | =====      |     |
| Bushbaby     | -----A..     | --K.K..... | HR.A.GV... | T.....      | ---N...H..  | V.N...A..  | S---H..R.  |     |
| Mouse lemur  | -----        | --K.....   | .K..GV...  | .R.....     | ---T.L.P.   | .R..I.A..  | S---PYT.GS |     |
| Tree shrew   | -----KGS.    | ..K..A.    | SRM..GA.H. | R..W.G.---  | ---NHR..K.  | .EN.GD...  | P---HR.Q.  |     |
| Pika         | -----K.H     | --KSES..I. | RN..EGIH.. | .I..EN.D--  | ---IHP..T.  | EWNH.I..N  | .RH--T.Q.  |     |
| Rabbit       | -----R       | --KSL...V  | RS..EGIH.. | .I..E.R--   | ---NH...I.. | V.S.I...I. | IRH--T..   |     |
| Squirrel     | -----        | --HK....   | SK..S.A..  | ..E..R--    | ---NH...P.  | D.....Y    | ARH-IH.RR. |     |
| Guinea pig   | -----QDS-    | --KN....P  | RNV..DV... | .R.QG.---   | ---RH.PGAG  | GRSN.GR.TG | A---GHT.CS |     |
| Kangaroo rat | -----GS.     | --K.HS...  | SK.L.GV..V | ..EG.---    | ---ND...-   | DH..SLL..  | N---H.RRD  |     |
| Rat          | -----SDR..   | --KK.QS..  | SV..TDVHN. | NDY.E.TE--  | ---NQ...LL  | L.N..GQ..H | ---P.ARRS  |     |
| Mouse        | -----R.G.Q   | --KR.QS..  | SV..DV.D.  | .VSL..I.--- | ---NQESYLL  | T.S.....H  | .KHTRQTRRS |     |
| Hedgehog     | =====        | =====      | =====      | =====       | =====       | =====      | =====      |     |
| Shrew        | -----EKNP.   | -----LT.P  | EKV-----S  | .SQPR=====  | =====       | =====      | =====      |     |
| Megabat      | -----K...    | --IKF.K..  | SK..T.VS.. | ..PL.GQ.--- | ---NH...P.  | ..I.....   | ---H...H.  |     |
| Microbat     | -----D...    | --DIK...P  | SK...A.H.  | .P.G.---    | ---NH...P.  | .PDI.A.A.. | ---H..Y.   |     |
| Cat          | -----A...    | --QH....   | SK...V..V  | .VP..R.---  | ---NY...P.  | ..NI.....  | ---RLT.Y.  |     |
| Dog          | -----A...    | --K...I.   | SK...V..V  | .VP..NR.--- | ---NY...P.  | ..NI.....  | ---HT...   |     |
| Horse        | -----        | --K.K.K.V  | SK...GAS.. | .GP.....    | ---SH.K.P.  | ..NI.....  | ---Y.....  |     |
| Vicugna      | -----KSK.K.. | --KSK.K..  | SK..TAV..G | .PT.I.---   | ---NH.S..R  | ..NTL...R  | A---V..H   |     |
| Cow          | -----G...    | --K....    | GK...DA..  | .P..QL----  | ---NH...-   | ..NI.....  | ---LT...   |     |
| Dolphin      | -----R....   | --KA....   | SKV..GA..  | .P..RI.---  | ---NH...-   | ..NI.....  | ---NI..... |     |
| Pig          | -----        | --K....    | SK...AA..  | .P..NI.---  | ---NHP.G..  | ..NI...R.  | P---L...   |     |
| Armadillo    | -----DRK.    | --K.KL.M.  | SKTR.GAY.. | E.SP.G.---  | ---NH...TH  | ..V...N..  | ---QS.Y.   |     |
| Sloth        | -----DR..    | --KKLTT..  | SK...GV... | D.SP.AR---  | ---NH...A.  | ..TI...RR. | I---Q..R.  |     |
| Tenrec       | -----R.K..   | --KKLGEAP  | HT..RGVHNE | E.SP.YE.--- | ---TL...A.  | .PNG.AQGTN | P---RHVRGG |     |
| Elephant     | -----R.DD.   | --KKK....  | .K.LRGA..  | E.LP.G.---  | ---NH..HA.  | ..NI..Q... | -----      |     |
| Hyrax        | -----RK.DA   | --KKI....  | .K.LRGAH.  | E.FP.Y.---  | ---NH..VA.  | ..NT.G...- | ---H...K   |     |
| Wallaby      | VVEKDT...    | IG-.SIY.-- | -KLE-GAK.P | ED--QG.GNK  | DIAND...VP  | N.NI..DHRV | I---SHV.YS |     |
| Opossum      | LIEK...-DN   | NT..STH.-- | -KPE-GAQFS | ET--QG.RDE  | DITNH..GI.  | N.NI.GDHRA | N---SLG.YA |     |

\*

Exon 5 (continued)

|              |            |         |        |            |         |       |            |            |             |            |
|--------------|------------|---------|--------|------------|---------|-------|------------|------------|-------------|------------|
| Human        | IDYLKHLKSV | KKIPS   | DFEFGS | GYTDLQERGD | NDISPF  | SGDG  | QPFKDIPGKG | EA-TGPDLEG | KDIQTGFAGP  | 350        |
| Chimpanzee   |            |         |        |            |         |       |            |            |             |            |
| Gorilla      |            |         |        |            |         |       |            |            | S           |            |
| Orangutan    |            |         |        |            |         |       |            |            |             |            |
| Gibbon       |            |         |        |            |         | M     |            |            |             |            |
| Macaque      | P          |         |        |            |         | M     |            | S          |             |            |
| Baboon       | P          |         |        |            |         | M     |            |            |             |            |
| Marmoset     | P          |         |        | V          |         |       |            |            | T.L.E       |            |
| Tarsier      | =====      | =====   | =====  | =====      | =====   | ===== | =====      | =====      | =====       | =====      |
| Bushbaby     | TGS...P    |         |        | S...G      |         | S     | Q          | G-I        | M...RVS.T   |            |
| Mouse lemur  | TH.....    |         |        | A.....     |         | S     | E          | G-L.HP.    | -----VP..   |            |
| Tree shrew   | T...Q.P    | HV      |        |            | AFP     |       | TA         | G-M...Q.   | A...S..     |            |
| Pika         | AEN.QQ.P.A | Q.V     |        |            | G       | IA    | AH         | GV-DSNSGP  | V.AH...TD.  |            |
| Rabbit       | A...Q.P    | VSR     |        |            | G       | T     | S...R      | GV-I...PG  | I.V...S..   |            |
| Squirrel     | TQ...QP.RA | R       |        |            | E       | F     | S.G.S      | G-LS.P.S   | TGVH.LP.    |            |
| Guinea pig   | AHCQTQ.NA  | PR.R    |        |            | G.A.G   |       | Q...D      | -----      | ---.LLV.    |            |
| Kangaroo rat | TH..TRVP.G | Q.V     |        |            | DI.P.T  | L     | L...VC.E   | G-I...IQT  | ELPDQ--S.S  |            |
| Rat          | TH..T..PQI | R..L    |        |            | ASP..LV | VP    | H.MHT.DR   | G-V.S.P.S  | SAGHP-V.S.S |            |
| Mouse        | TH..T..PQI | R..L    |        |            | SP..LV  | VP    | H.MH.      | G---SGP.S  | STSRP-LS.S  |            |
| Hedgehog     | =====      | =====RV |        |            | HSAPEG  | T     | LGE        | ---D.G..D  | TNT..EPS..  |            |
| Shrew        | =====      | =====   |        |            | =====   | ===== | =====      | =====      | =====       |            |
| Megabat      | T...Q      |         |        |            | P       | NM    | S          | V-ID..Q.   | A...E.S.    |            |
| Microbat     | T...QFPTL  |         |        |            | P       | Y     | S          | ---M...VS  | A...ELS..   |            |
| Cat          | T..S.Q.P.L |         |        |            | P       | G     | S          | P-I...K    | T...E.S.    |            |
| Dog          | ..P.Q.Q    |         |        |            | P       |       | S          | P-I...K    | T...ESS..   |            |
| Horse        | T...Q.P    |         |        |            | P       |       | S          | ---I...P.  | A.V.E.S.    |            |
| Vicugna      | M...QPP    | V       |        |            | P       | G     | G          | ---I...R.D | AES.E.SS.   |            |
| Cow          | M...Q.P    |         |        |            | P       | G     | L          | D-ID..RKS  | T...ELSI.   |            |
| Dolphin      | M.C..Q.P.A | QVS     |        |            | P       | QOE   | SS         | D-IR..R    | T...E.SS.   |            |
| Pig          | T...Q.P    |         |        |            | P       | G     |            | ---R..R    | T...E.SS.   |            |
| Armadillo    | T.S.TQ     | R       |        |            | D       | A     | N          | G.IF...DH  | I.V...S..   |            |
| Sloth        | TA...Q.P   |         |        |            | E       |       | N          | G.TVV...DH | T.V...SR.   |            |
| Tenrec       | T.F.QQ.T   | TL.R    |        |            | PH.RQ   | D.VG  | SE.L.Q     | T-S.P.P    | P...ESEA    |            |
| Elephant     | --R.Q.P    | T       |        |            | N       |       | E          | ---TD      | T...E.S.    |            |
| Hyrax        | A..Q.QFPRA | QTF     |        |            | E       | G.F   | E          | K-S.V.V    | T.N...L..   |            |
| Wallaby      | T..S.LSL.Y | V.F.Y   |        |            | QG      | I-FSP | SRE        | ---MLV.ET  | T-DGYTSP    | P.PDKANVIS |
| Opossum      | TE.S.LSP.Q | I.F.Y   |        |            | QEE     | F.S   | G          | ---MVD.DR  | T-SGYTNV    | P.PDKTN.IK |
|              |            | # #     |        |            |         |       |            |            |             | #+++       |

Dentonin region

Exon 5 (continued)

|              |            |         |         |       |        |           |            |            |            |            |
|--------------|------------|---------|---------|-------|--------|-----------|------------|------------|------------|------------|
| Human        | SEAESTHLDT | KKP     | GYNEIPE | RBE   | ----NG | GN-----TI | GTRDETAKEA | DAVDVSLV-E | GSNDIMGSTN | 420        |
| Chimpanzee   |            |         |         |       |        |           |            |            |            |            |
| Gorilla      |            |         | V       |       |        |           |            |            |            |            |
| Orangutan    |            |         | RK      |       |        |           |            |            |            |            |
| Gibbon       |            |         |         |       |        |           |            |            |            |            |
| Macaque      | N          | E       |         | K     |        |           | G          |            | N          |            |
| Baboon       | T          | N       | E       |       |        |           | G          |            | N          |            |
| Marmoset     | G          | N       | RE      |       | K      | R         | S          | V          | G          | I          |
| Tarsier      | ====DP     | TG      |         | K     | RD     |           | N          |            |            | P          |
| Bushbaby     | G...TLTP   | RG.H    |         |       | A      |           | Q          | RQP        | G          | I          |
| Mouse lemur  | G...AVTH   | RG      |         | G     | DY     | IV        | D          | R          | I          | R          |
| Tree shrew   | ...AGD     | RG      |         | A     | D      | V         | A          | N.EV       | G.AGA      | L.T.       |
| Pika         | R...VIDPS  | RGS     |         | E     | Q      |           | F          | GG.T       | T-E        | V          |
| Rabbit       | RK.AIDP    | G       |         |       | D      | AF        | Q          |            | T          | A-K        |
| Squirrel     | R..ATINP   | RGAD    |         |       | SD     | A         | DKHQ.G.G   | GTA        | I          | T.T        |
| Guinea pig   | G...TSDT.R | RGL.P.T |         | TDG   | GR     | VL        | VA.VG.E    | G.AVP      | G          | S.L        |
| Kangaroo rat | ---TIN.P   | RL      | L       | T     | G      | H         | S          | V          | ASSDRV.T   | G-IG       |
| Rat          | .NV.IVDPH  | NGL.S   | G       | G     | HI     | G         | AY         | A.GK.QG    | GSA        | E.T.K      |
| Mouse        | .K.VIDPHM  | SGL.S   | G       | G     | H      | S         | AY         | A.KA.QG    | GSAGG      | E.T        |
| Hedgehog     | DV.GTVP.NS | GD.PH.L | G       | QG    | DT     | HT        | LE         | LG         | -TA        | N          |
| Shrew        | =====      | =====   | =====   | ===== | =====  | =====     | =====      | =====      | =====      | =====      |
| Megabat      | ...TVKPEA  | GG      | D       | K     |        | R         | EQ         | NTA        |            | I.D        |
| Microbat     | G...TIDPE  | GG      |         | A     | D      | R         | A          | G          | R          | NTA        |
| Cat          | ..D----    | RG      |         | K     |        | R         |            | R          | NTA        | V          |
| Dog          | R..DTISP   | ARR     |         | S     | S      |           |            | R          | S-T        |            |
| Horse        | ...TS.P.A  | RG      |         | E     |        | A         |            | G          | N.AG       |            |
| Vicugna      | .V.TITP.A  | RG      |         | K     | G      | R         |            |            | N.G        |            |
| Cow          | .T.T.SP.A  | G       |         | K     | R      | RK        | T          | GK.Q       | NT         |            |
| Dolphin      | ...TINP.V  | RG      |         | K     | G      |           |            |            | QK         | N.A        |
| Pig          | ...TI.P.A  | RG      | S       | K     | G      | RD        |            | GK         |            | NGA        |
| Armadillo    | .G.TPTP    | GA      |         | K     |        |           | AV         | EA         | R          | AG         |
| Sloth        | .SGTSPS    | MGL     |         | K     | D      | D         | R          | EA         |            | A.PE.R     |
| Tenrec       | TQPDR      | RGS     | KGG     | SSR   | DA     | IG        | S          | DPAAP      | GS         | TGA.R.E    |
| Elephant     | ...DT      | RG      |         | K     | K      |           | A          | E          | T          | AG.RV      |
| Hyrax        | ...T       | RG      |         | E     | D      | D         | S          | R          | V.G.G      | E.AG       |
| Wallaby      | .NSKLLKG   | EGN     | V       |       |        | DPTGGIVG  |            | VSKTPR     | K          | NII.NQII-R |
| Opossum      | NNSKFLIG   | EDN     |         | K     | HDLNS  |           | STRDIIGN   | DVSKTORE   | K          | NI-NKIL-G  |
|              |            | #       |         |       |        |           | *          |            |            | # #        |

Exon 5 (continued)

|              |                |                |                |              |                |             |                |             |             |
|--------------|----------------|----------------|----------------|--------------|----------------|-------------|----------------|-------------|-------------|
| Human        | FKELPGREGN     | RVDAGSONAH     | QGKVEFHYP      | APSKEKRKE    | -----GSSDA     | AESTNYNEIP  | KNGKGS         | STRKG       | 490         |
| Chimpanzee   | .....          | .....          | .....          | .....        | -----          | T.....      | .....          | .....       |             |
| Gorilla      | .....          | .....          | .....          | .....        | -----          | T.....      | .....          | .....       |             |
| Orangutan    | .....          | .....          | .....          | .....        | -----          | T.....      | R.....         | V.....      |             |
| Gibbon       | .....          | .....          | .....          | .....        | -----          | T.....      | R.....         | V.....      |             |
| Macaque      | .....          | .V.G           | .....          | .....        | -----          | T.....      | .D.            | A.....      |             |
| Baboon       | .....          | .V.G           | .....          | .....        | -----          | T.....      | .....          | A.....      |             |
| Marmoset     | .K.....        | .....          | .....          | .....        | -----          | T.....      | .....          | DGA.....    |             |
| Tarsier      | .....K.....    | .....S.....    | .....F.....    | S.....       | -----R.....    | T.....      | V.....         | H.Q.....    |             |
| Bushbaby     | .....K.....    | .....S.....    | .....RI.....   | H.....       | -----R.V       | T.....      | S.....         | .....       |             |
| Mouse lemur  | .Q.....K.....  | .....G.....    | .....          | H.....       | -----D.....    | S.....      | TOT.T.....     | .....E..... |             |
| Tree shrew   | .Q.....        | .....T.G.....  | .....          | Q.....       | -----P.....    | R.....      | T.....         | F.....      | N.G.....    |
| Pika         | .....K.....    | .E.I.....      | .....F.....    | Q.....       | -----P.D.....  | .....       | T.AH.....      | N.....      | S.Q.....    |
| Rabbit       | .K.S.K.....    | .....D.....    | .....F.....    | Q.....       | -----Q.....    | R.....      | TP.....        | .....       | S.....      |
| Squirrel     | .....K.....    | .....          | .....          | H.....       | -----V.....    | RS.....     | T.....         | M.A.....    | S.....      |
| Guinea pig   | .RD.....K..... | .....M.....    | R.....L.....   | S.....       | V.FQGQT.G      | -----GGV.   | SK.VAH.....    | H.....      | A.A.....    |
| Kangaroo rat | .R.....K.....  | .....NTD.....  | .....R.....    | N.....       | -----R.G.D     | -----DR..   | N.AH.....      | H.....      | SN.....     |
| Rat          | .R.....K.....  | .....S.....    | .....          | Q.....       | -----V.G       | -----REH    | TGKAG.....     | SS.....     | G.S.D.....  |
| Mouse        | .R.....K.....  | .....IN.....   | .....          | Q.....       | VA.R.V.G       | -----VEH.   | G-RAG.....     | SS.....     | SS.D.....   |
| Hedgehog     | LGG.....TGSS   | .GG.D.....     | R.Q.....       | S.....       | PTE.R.....     | -----S.R-G  | .GQ.H.....     | R.Q.....    | GSH.....    |
| Shrew        | =====          | =====          | =====          | =====        | =====          | =====       | =====          | .....Q      | .....A..... |
| Megabat      | .....K.....    | .....          | .....I.....    | H.....       | V.....K.....   | -----R.V    | .....          | .....       | S.....      |
| Microbat     | .....K.....    | .....G.....    | .....          | H.....       | V.P.....R..... | -----R.V    | .....          | R.....      | GS.....     |
| Cat          | .....K.....    | .....S.....    | .....          | H.....       | P.....K.....   | -----I..... | .....          | .....       | TS.....     |
| Dog          | .....K.....    | .....G.N.....  | .....          | F.....       | P.....KA.....  | -----V..... | .....          | .....       | S.D.....    |
| Horse        | .K.....K.....  | .....          | .....Q.....    | D.....       | P.....         | -----T.V    | T.....         | V.....      | G.S.....    |
| Vicugna      | .K.....K.....  | .....G.....    | V.....I.....   | F.....H..... | T.....D.....D  | -----NG     | .....          | Q.....      | S.....      |
| Cow          | L.K.....Q..... | .....HG.....   | D.....E.I..... | H.....       | V.....DQ.....D | -----R.G    | .G.....        | P.....      | S.....      |
| Dolphin      | .K.S.E.S       | .....G.....    | R.....E.I..... | H.....       | TED..ED        | -----G.G    | .....          | .....       | S.D.....    |
| Pig          | .K.....K.....  | .....GGS.....  | .....I.....    | H.....       | .....D.....G   | -----G..... | .....          | .....       | S.....      |
| Armadillo    | .....K.....    | .....          | .....          | H.....       | G.....RK.G     | -----GT     | M.....AD.....  | L.....      | MA.VLE.V    |
| Sloth        | .....K.D       | S.....         | V.....         | H.....       | G.....E.G      | -----GGT    | I.....         | .....       | S.S.....    |
| Tenrec       | LQ.....H---    | H.....S.R..... | R.G.ML         | G.....       | T.....G.....   | -----SGREV  | TQ.....KD..... | .....       | SG.....     |
| Elephant     | .....K.....    | .....LVVKMLI   | K.SR-V.....    | H.....       | T.....R.....   | -----SG.V   | TK.K.D.....    | .....       | A.....      |
| Hyrax        | .....RK.A      | G.S.....       | .....          | H.....       | .....          | -----S.R.V  | TK.T.....      | .....       | PQ.L.....   |
| Wallaby      | Y.....N.D      | GF.NTG         | .Y.ESLGV.HSQ   | GSL.KQSIIG   | QDARK.N.I      | R.GK.....   | .....S         | .....       | HD.DHСКА-   |
| Opossum      | YRK.....K..... | DF.NTV.....    | .....SGG.HSQ   | QSLKQ.IIG    | QHANKS.I.I     | I.G.D.....  | .....S         | .....       | Y.DK.KA-    |

Exon 5 (continued)

|              |                 |               |               |                |                |             |               |           |         |
|--------------|-----------------|---------------|---------------|----------------|----------------|-------------|---------------|-----------|---------|
| Human        | VDHSNRNQAT      | LN-EKQRFPS    | KGKSQLPIP     | SRLDNEIK-      | -NEMDSFNPG     | SHEN--IIT-  | -HG----       | -RK       | 560     |
| Chimpanzee   | .....H.....     | .....         | .....         | .....          | -T.....        | .....       | .....         | .....     |         |
| Gorilla      | .....           | .....         | .....         | .....          | -T.....        | .....       | .....         | .....     |         |
| Orangutan    | .....           | .....         | .....         | .....          | -T.....        | .....       | .....         | S.....    |         |
| Gibbon       | .....           | .....         | .D.A.....     | .....          | -T.....        | N.....      | .....         | S.....    |         |
| Macaque      | .D.....I        | H.....        | .....         | .....          | -T.....        | L.....      | N.....        | P.....    | S.....  |
| Baboon       | .D.....         | H.....E.....  | .....         | .....          | -T.....        | L.....      | N.....        | S.....    |         |
| Marmoset     | .....           | .....         | .....D.S      | .....          | -TK.N.L.....   | N.....      | .....         | S.....    |         |
| Tarsier      | TA.....S.....   | W.....        | .....D.S.LV   | H.I.....       | .....          | IG.H.....   | -NSEES.....   | -QS.....  |         |
| Bushbaby     | TE.....G        | I.-G.....S    | .....QF.....  | H.....V.....   | .....          | IG.RY.....  | DTDRD.....    | -S.....   |         |
| Mouse lemur  | KER.D.....G     | VR.....YS     | .....PLV..... | .....D.AQ..... | .....          | IGPH.....   | -NSARGLT..... | -S.....   |         |
| Tree shrew   | A.....H.SP.     | F.-D.....IS   | .G.R.SL       | .D.....D       | -----G.PHH.    | -NNEGKM..P  | -R.....       | NN.....   |         |
| Pika         | TE.V.RRP        | HPH.T.....S   | .....SG.....  | =====          | =====          | =====       | =====         | =====     |         |
| Rabbit       | TG.....D.....VN | V-H.N.....SA  | .....D.LS     | .....M.....    | .....          | IG.HG.....  | -NNRGNT.....  | -S.....   |         |
| Squirrel     | TEL.....RV      | A.-G.....S    | Q.G.LV        | .Q.....D.....  | .....          | VGPH.....   | -GNEGNT.....  | -QS.....  |         |
| Guinea pig   | TEP.G.....A     | S.....HQ.F    | R.E.RGI       | P.....         | .....          | IS.HH.....  | -SEGNGV.....  | -S.....   | R.....  |
| Kangaroo rat | PEQ.....EVI     | S.....P.LS    | Q.....RT      | H.....R.....   | .....          | IG.H.D.     | -GNILKHGR-    | -QS.....  |         |
| Rat          | AEE.KG.V        | .T-S.....G    | .....G----    | S.HS.G.V       | -S.E.S.SL      | -SREGIA.A-  | -R.....       | .....     |         |
| Mouse        | AEE.KG.L        | .T-AS.....G   | .....PAL      | HS.S.V         | -S.EN-         | .....       | .....         | .....     |         |
| Hedgehog     | AK.IGSW.P       | NQ-G.EG.G     | .L.HHD-       | -----V.TH-     | -GRKG-HYV      | HKQSN--ST   | -RN.....      | .....     |         |
| Shrew        | MEY.SKS.V       | SR.....ELS    | .SE.R.PLL     | .L--A----      | .....          | IA.RYD      | RVQ-GALV-     | -QS.....  | GE..... |
| Megabat      | TEY.H.....V     | S.....E.....  | .....Q.....   | H.....         | -----TGIG.HS.. | -NNEG-T.T   | -S.....       | .....     |         |
| Microbat     | TE.....V        | VS.....       | .SQ.P.QL      | PQ.....D.....  | .....          | S.IG.HSD    | -NNEG-T.PA    | -S.....   | GR..... |
| Cat          | TE.....I        | S.....        | .....RLV      | =====          | =====          | =====       | =====         | =====     |         |
| Dog          | TE.....KVI      | ST-G.....T    | .....SQLV     | HD.....        | .....          | IG.H.L      | -NNEE-T.IT    | -QS.....  |         |
| Horse        | PE.....V        | S.....G       | .....RFT      | =====          | =====          | =====       | =====         | =====     |         |
| Vicugna      | T.F.K.V         | S.....T.....  | .....G.RL     | P.F.DF-        | .....          | IGFH.R      | -NNEG-T..     | -S.....   |         |
| Cow          | TQ.T.Y.EP       | SK.....       | .SEG.QL       | P.....         | .....          | H.IG.H..... | -NNEG-T.T     | -S.....   |         |
| Dolphin      | TE.K.M          | S.....        | .....G.QF     | .....          | .....          | IG.H.....   | -NNEG-TVIT    | -S.....   |         |
| Pig          | PGP.D.S.V       | SS.....S..... | .....G.QLT    | .....N.....    | .....          | G.HSD       | -NNEG-T.IT    | .....     |         |
| Armadillo    | QE.HK.VS        | VH.....S.SG   | .S.S.LT       | .P.F.....      | .....          | VGPY.....   | -NNERT-IT     | -NG.....  |         |
| Sloth        | TGG.T.H.VS      | V.....SA      | .....KDPL     | .....V.....E   | .....          | IGPH.....   | -DNEGNT-IT    | -SSG..... |         |
| Tenrec       | AG.H.....V      | ST-E.KP.G     | .R.P----      | A.....         | .....          | IG.YKS      | -ASEENR-VA    | -NDG..... | GR..... |
| Elephant     | A.....E         | .K-R.SG       | .R.....S      | P.....D.....   | .....          | IG.Y.....   | -TNEENA-VI    | -YG.....  |         |
| Hyrax        | TEG.K.ES        | .K-R.SG       | QE.....S      | P.....M.....   | .....          | KIV.HK      | -THEGNT-VT    | -YNG..... | T.....  |
| Wallaby      | GVE.SKRQK       | TKND.EKKIN    | .....LT       | H.QTYPL.G      | E.GRKNEAHL     | HYGYSKERSI  | T-QFSSSS      | .....     |         |
| Opossum      | GIG.SKRQK       | TKND.EKSL     | E.G.S.F.      | .YSHTYPS.G     | A.DI-----      | .....       | .....         | .....     |         |

\*

Exon 5 (continued)

|              |             |            |             |            |             |          |             |               |
|--------------|-------------|------------|-------------|------------|-------------|----------|-------------|---------------|
| Human        | YHYVPHRQNN  | STRNKGMPQG | KGSWG-RQPH  | SNRRF-SSRR | RDD         | SSSESS-D | SGSSSESDGD  | -----         |
| Chimpanzee   | .....S      | ..W.....H. | .....       | .....      | .....       | .....    | .....D..... | -----         |
| Gorilla      | .....       | .....H.    | .....       | .....      | .....       | .....    | .....       | -----         |
| Orangutan    | .....       | .....H.    | .....       | .....S     | .....       | .....    | .....       | -----         |
| Gibbon       | .....       | .A..S..H.  | .....       | .....      | .....       | .....    | .....       | -----         |
| Macaque      | .....       | P.....H.   | .....       | .....Y     | .....L..... | .....E   | .....       | -----         |
| Baboon       | .....       | P.....V.H. | .....       | .....Y     | .....       | .....    | .....       | -----         |
| Marmoset     | .....       | .LG..T..   | .D.....     | .....      | .....P      | ..K      | .D.-        | -----         |
| Tarsier      | ..G.....K   | .....R     | ..FQ.Y.K.   | P..L-.PAG  | K.          | .....    | .S.....N..  | -----         |
| Bushbaby     | ..A...P..   | .V..N.I..R | ..PR.Y.R..  | .HGGV-.CPG | K.S         | .....    | .....       | -----         |
| Mouse lemur  | ..G...G..D  | .A..N...R  | R.PG.H.R..  | FYG...-P   | K.          | .....S   | .....       | -----         |
| Tree shrew   | .....G...   | .I.....S.R | R.....Y.RA. | ..SV-RPWK  | K.          | .D.-     | .....       | -----         |
| Pika         | =====       | =====      | =====       | =====      | =====       | =====    | =====       | =====         |
| Rabbit       | N.....P.D.  | EAW.S.V..R | ..L..Y.RS.  | ..S.-RL.K  | K.          | .....    | .....       | -----         |
| Squirrel     | G.....GR.D  | ..W..S.S.R | ...YY.K.    | .S.N.-.PP. | .....       | .....    | .....       | -----         |
| Guinea pig   | NLQASRG..D  | TVGG.AGA.R | R...H.R..   | .H.G.-.P   | SW          | .ND..-   | .S.....S.R  | -----         |
| Kangaroo rat | ----QDG.H.  | .LW...RY.R | R.P.SY.R..  | .H.S.-.PSK | ..H         | .....    | .D..G..E..  | -----         |
| Rat          | -----TSH    | P...R..S.R | R...PS.R..  | PH..V-.T   | QR          | .....S   | .....S..    | -----         |
| Mouse        | ...F.G...   | L.P...S.R  | R...PS.R.N  | .H..A--T   | QR          | .....S   | .....H..    | -----         |
| Hedgehog     | -----       | ---R.SWGS  | RIPHSN.FS.  | PRK-Y----  | ---         | .....S   | .D.W...E..  | -----         |
| Shrew        | S.DAQR.R.S  | N...AAS.R  | EDP.AD.K.F  | ..L--RRP   | KP          | .....S   | .S.....     | -----         |
| Megabat      | -K.=====    | =====      | =====       | =====      | =====       | =====    | =====       | =====         |
| Microbat     | NQ.G.....S  | .AWGQ.L.RR | R...AH.KS.  | PS..V-RPP  | KHG         | .....    | .T.....     | -----         |
| Cat          | =====       | ==D.V.KE   | .APG.Y.K.L  | .S...-RPP  | KQ          | .D.-     | .....       | -----         |
| Dog          | N.....-     | ..W...V.KR | ....Y.K..   | .R..V-.PP. | .H          | .....    | .D.....     | -----         |
| Horse        | =====       | =====      | =====       | ==S.-.HP   | KR          | .....    | .D.....     | -----         |
| Vicugna      | N.....ES.   | ..W...V..R | ....Y.R..   | .S..A-RPPK | .H          | .....    | .....       | -----         |
| Cow          | N.....      | YAW...GS.S | ..T..Y.NS.  | .....-RPPK | KH          | .....    | .....       | -----         |
| Dolphin      | NYS...RY.   | .MQ...VL.S | ....Y.=.    | .K...-RPPK | KH          | .=-.-    | =...D...    | -----         |
| Pig          | N.D.HY....  | Y..S...S.R | ....Y.K.P   | .....-HPP  | KH          | .....    | .....       | -----         |
| Armadillo    | NY.I.....T  | .SW...S.R  | ...NY.K.Q   | .SSNASR.P  | KG          | .....-A  | .D.....     | -----         |
| Sloth        | N..T.G... . | IQR...L.R  | ...YY.K.Q   | .RGNV-RY.G | K.          | .....-E  | .D..G....   | -----         |
| Tenrec       | RL.A.PWR..  | AA.G..VSR. | N..REP.R..  | ...SR-DR.. | QG          | ....P.-E | .D...S.E..  | -----         |
| Elephant     | N..I...E.S  | A.Q...S.R  | ...HY.R..   | ...SP-RPP  | K.          | .....-E  | .D...D...   | -----         |
| Hyrax        | N.....      | A.....S.R  | ...YY.R..   | .Y.YP-RPP  | KH          | .....    | .D...D...   | -----         |
| Wallaby      | N.HAE..KFS  | -----PG.-  | .RF..PMNS.  | .SK...KPLK | .N          | .D.-S    | .D.-D..S.   | QSSEYFQGGSGN  |
| Opossum      | K..ATR.KFS  | ..KSHQVNGR | .RF..PKNA.  | .KKK.-K.PK | .N          | .D.T-S   | .DH..D..S.  | QSMIEYF.GGSAN |

# + # + # +  
ASARM peptide
